# Supplementary material
Source: publisher figshare collection journal article supplement (https://acs.figshare.com/ndownloader/files/4449394)
Supplement: Supplementary file 1 [file 4449394]

**Supplementary material as noted in the text.**

Supplemental Material: Figures S1-S6 and Tables S1-S6

**Collision-Induced Dissociation of the A+2 Isotope Ion Facilitates Glucosinolates Structure  
Elucidation by ESI-Tandem Mass Spectrometry with a Linear Quadrupole Ion Trap**

**Tommaso R. I. Cataldi,<sup>1,\*</sup> Filomena Lelario,<sup>2</sup> Donatella Orlando<sup>2</sup> and Sabino A. Bufo<sup>2</sup>**

<sup>1</sup>*Dipartimento di Chimica, Università degli Studi di Bari, Campus Universitario,  
Via E. Orabona, 4 - 70126 Bari, Italy*

<sup>2</sup>*Dipartimento di Scienze dei Sistemi Colturali, Forestali e dell'Ambiente,  
Università degli Studi della Basilicata, Via dell'Ateneo Lucano, 10 - 85100 Potenza, Italy*

---

\* Author for correspondence, email: [tommaso.cataldi@chimica.uniba.it](mailto:tommaso.cataldi@chimica.uniba.it)

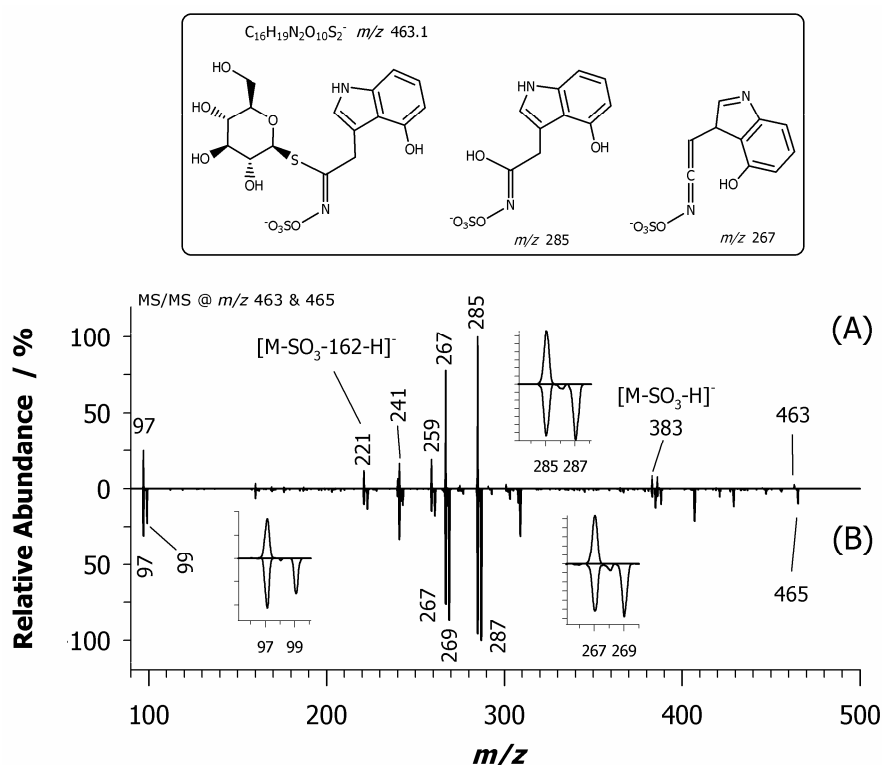

**Figure S1.** Product ion spectra obtained by LC-ESI-LTQ MS/MS in negative ion mode of (A) 4-hydroxy-glucobrassicin [1S] at  $m/z$  463 and 20% collision energy. (B) The A+2 isotope peak at  $m/z$  408 was fragmented at the same collision energy. See data reported in Table S1.

**Table S1.** Experimental and calculated ratios ( $I_A/I_{A+2}$ ) for the isotope abundances of the fragment ions as observed by CID of the +2 Da isotopomer of deprotonated 4-hydroxy-glucobrassicin  $[M-H]^-$  at  $m/z$  465 ( $C_{16}H_{18}N_2O_{10}S_2^- + 2$ ).

| Ions A and A+2<br>( $m/z$ ) | Molecular<br>formula (A) | Expected<br>ratio | Expected ratio counting<br>only the contribution of $^{34}S$ | Measured<br>ratio ( $n=5$ ) |
|-----------------------------|--------------------------|-------------------|--------------------------------------------------------------|-----------------------------|
| 97-99                       | $HSO_4^-$                | 1.08              | 1 S : 1 S                                                    | $1.21 \pm 0.08$             |
| 259-261                     | $C_6H_{11}O_9S^-$        | 0.80              | 1 S : 1 S                                                    | $0.82 \pm 0.04$             |
| 267-269                     | $C_{10}H_7N_2O_5S^-$     | 0.94              | 1 S : 1 S                                                    | $0.91 \pm 0.05$             |
| 285-287                     | $C_{10}H_9N_2O_6S^-$     | 0.88              | 1 S : 1 S                                                    | $0.95 \pm 0.06$             |
| 383-385                     | $C_{16}H_{18}N_2O_7S^-$  | 0.70              | 1 S : 1 S                                                    | $0.62 \pm 0.10$             |

[1S] 4-hydroxy-glucobrassicin is an indole glucosinolate (see Agerbirk N, De Vos M, Kim JH, Jander G. Indole glucosinolate breakdown and its biological effects *Phytochem Rev.* 2009; 8: 101).

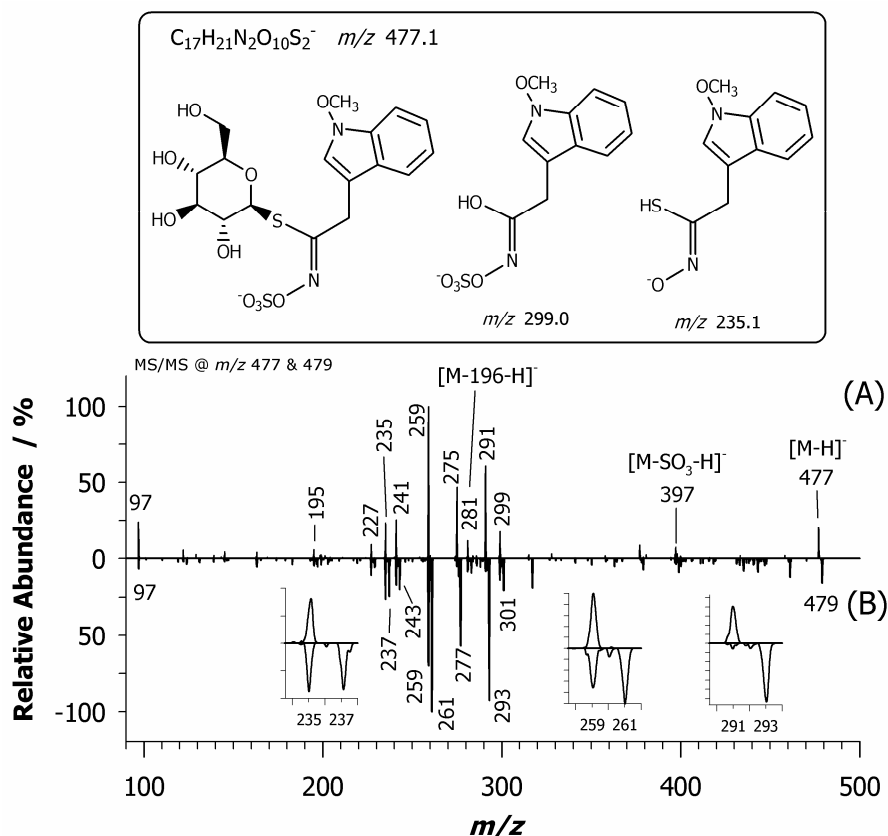

**Figure S2.** Product ion spectra obtained by LC-ESI-LTQ MS/MS in negative ion mode of (A) neoglucobrassicin (1-methoxy-3-indolylmethyl glucosinolate)  $[M-H]^-$  at  $m/z$  477 and 20% collision energy. (B) The A+2 isotope peaks at  $m/z$  479 (A+2) was fragmented at the same collision energy. See data reported in Table S2.

**Table S2.** Experimental and calculated ratios ( $I_A/I_{A+2}$ ) for the isotope abundances of the fragment ions as observed by CID of the +2 Da isotopomer of deprotonated neoglucobrassicin  $[M-H]^-$  at  $m/z$  479 ( $C_{17}H_{21}N_2O_{10}S_2^- + 2$ ).

| Ions A and A+2<br>( $m/z$ ) | Molecular<br>formula (A) | Expected<br>ratio | Expected ratio counting only<br>the contribution of $^{34}S$ | Measured ratio<br>( $n=5$ ) |
|-----------------------------|--------------------------|-------------------|--------------------------------------------------------------|-----------------------------|
| 97-99                       | $HSO_4^-$                | 1.08              | 1 S : 1 S                                                    | LSs                         |
| 235-237                     | $C_{11}H_{11}N_2O_2S^-$  | 1.11              | 1 S : 1 S                                                    | $1.07 \pm 0.04$             |
| 241-243                     | $C_6H_9O_8S^-$           | 0.90              | 1 S : 1 S                                                    | $0.88 \pm 0.04$             |
| 259-261                     | $C_6H_{11}O_9S^-$        | 0.84              | 1 S : 1 S                                                    | $0.80 \pm 0.04$             |
| 275-277                     | $C_6H_{11}O_8S_2^-$      | 0.11              | 0 S : 1 S                                                    | $0.10 \pm 0.02$             |
| 291-293                     | $C_6H_{11}O_9S_2^-$      | 0.09              | 0 S : 1 S                                                    | $0.09 \pm 0.02$             |
| 299-301                     | $C_{11}H_{11}N_2O_6S^-$  | 0.84              | 1 S : 1 S                                                    | $0.80 \pm 0.03$             |

LSs= low signals.

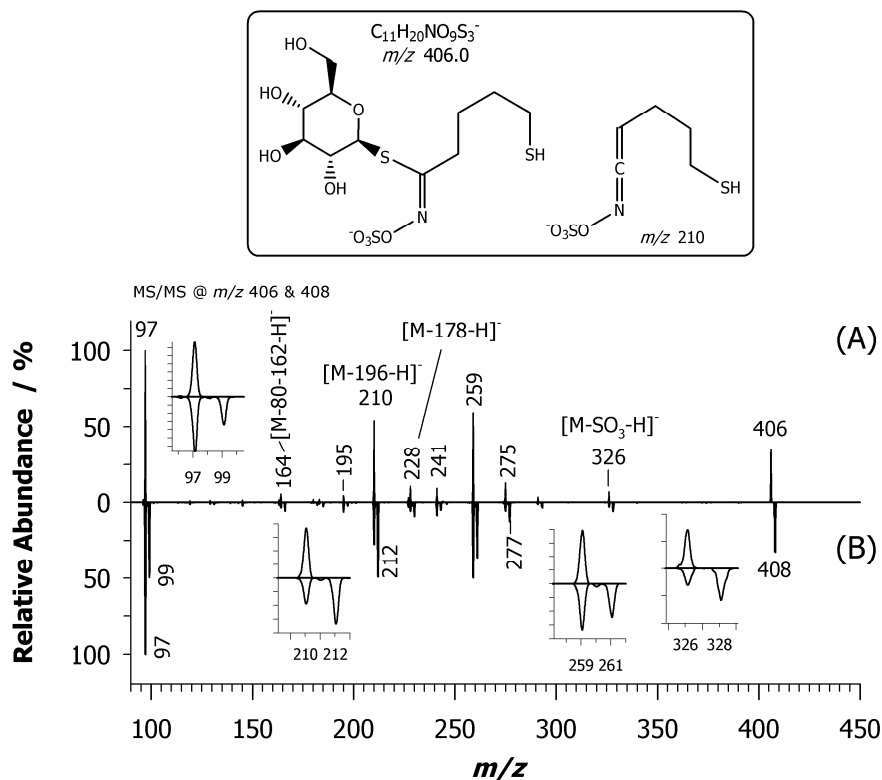

**Figure S3.** Product ion spectra obtained by LC-ESI-LTQ MS/MS in negative ion mode of (A) 4-mercaptobutyl-GLS  $[M-H]^-$  at  $m/z$  406 and 25% collision energy. (B) The A+2 isotope peak at  $m/z$  408 was fragmented at the same collision energy. See data reported in Table S3.

**Table S3.** Experimental and calculated ratios ( $I_A/I_{A+2}$ ) for the isotope abundances of the fragment ions as observed by CID of the +2 Da isotopomer of deprotonated 4-mercaptobutyl-GLS at  $m/z$  408 ( $C_{11}H_{20}NO_9S_3^- + 2$ ).

| Ions A and A+2<br>( $m/z$ ) | Molecular<br>formula (A) | Expected<br>ratio | Expected ratio counting only<br>the contribution of $^{34}S$ | Measured ratio<br>( $n=5$ ) |
|-----------------------------|--------------------------|-------------------|--------------------------------------------------------------|-----------------------------|
| 97-99                       | $HSO_4^-$                | 1.89              | 2 S : 1 S                                                    | $1.85 \pm 0.04$             |
| 210-212                     | $C_5H_8NO_4S_2^-$        | 0.57              | 1 S : 2 S                                                    | $0.55 \pm 0.05$             |
| 259-261                     | $C_6H_{11}O_9S^-$        | 1.40              | 2 S : 1 S                                                    | $1.42 \pm 0.06$             |
| 275-277                     | $C_6H_{11}O_8S_2^-$      | 0.44              | 1 S : 2 S                                                    | $0.46 \pm 0.06$             |
| 326-328                     | $C_{11}H_{20}NO_6S_2^-$  | 0.47              | 1 S : 2 S                                                    | $0.46 \pm 0.03$             |

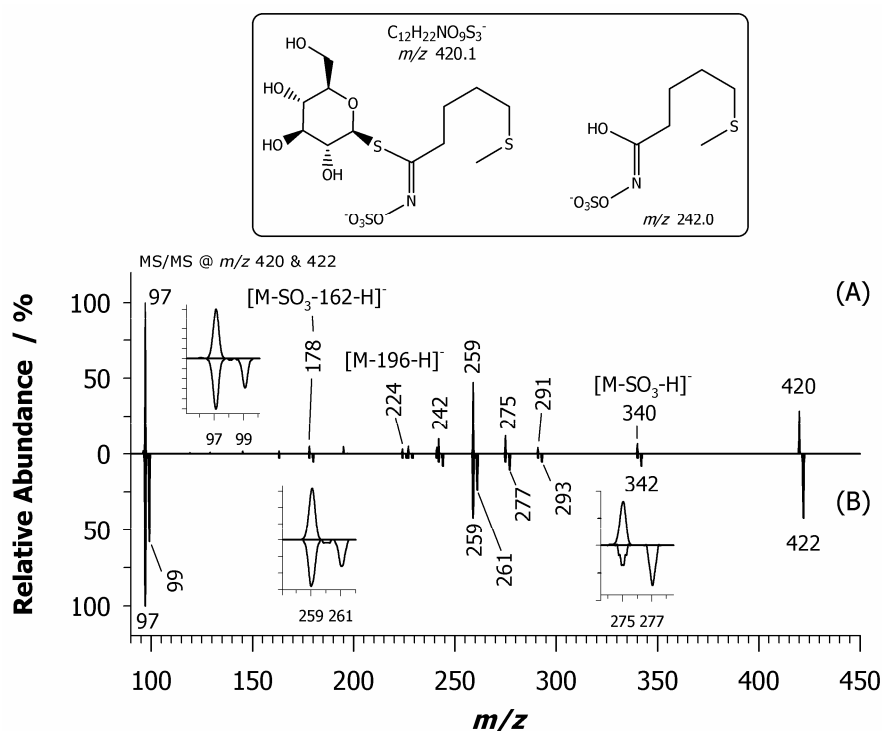

**Figure S4.** Product ion spectra obtained by LC-ESI-LTQ MS/MS in negative ion mode of (A) glucorucin (4-methylthiobutyl glucosinolate)  $[M-H]^-$  at  $m/z$  420 and 20% collision energy. (B) The A+2 isotope peak at  $m/z$  422 was fragmented at the same collision energy. See data reported in Table S4.

**Table S4.** Experimental and calculated ratios ( $I_A/I_{A+2}$ ) for the isotope abundances of the fragment ions as observed by CID of the +2 Da isotopomer of deprotonated glucorucin  $[M-H]^-$  at  $m/z$  422 ( $C_{12}H_{21}NO_9S_3^- + 2$ ).

| Ions A and A+2<br>( $m/z$ ) | Molecular<br>formula (A) | Expected<br>ratio | Expected ratio counting only<br>the contribution of $^{34}S$ | Measured ratio<br>( $n=5$ ) |
|-----------------------------|--------------------------|-------------------|--------------------------------------------------------------|-----------------------------|
| 97-99                       | $HSO_4^-$                | 1.89              | 2 S : 1 S                                                    | $1.86 \pm 0.05$             |
| 178-180                     | $C_6H_{12}NOS_2^-$       | 0.67              | 1 S : 2 S                                                    | $0.63 \pm 0.08$             |
| 242-244                     | $C_6H_{12}NO_5S_2^-$     | 0.54              | 1 S : 2 S                                                    | $0.60 \pm 0.04$             |
| 259-261                     | $C_6H_{11}O_9S^-$        | 1.41              | 2 S : 1 S                                                    | $1.46 \pm 0.05$             |
| 275-277                     | $C_6H_{11}O_8S_2^-$      | 0.45              | 1 S : 2 S                                                    | $0.48 \pm 0.04$             |
| 340-342                     | $C_{12}H_{21}NO_6S_2^-$  | 0.46              | 1 S : 2 S                                                    | $0.41 \pm 0.05$             |

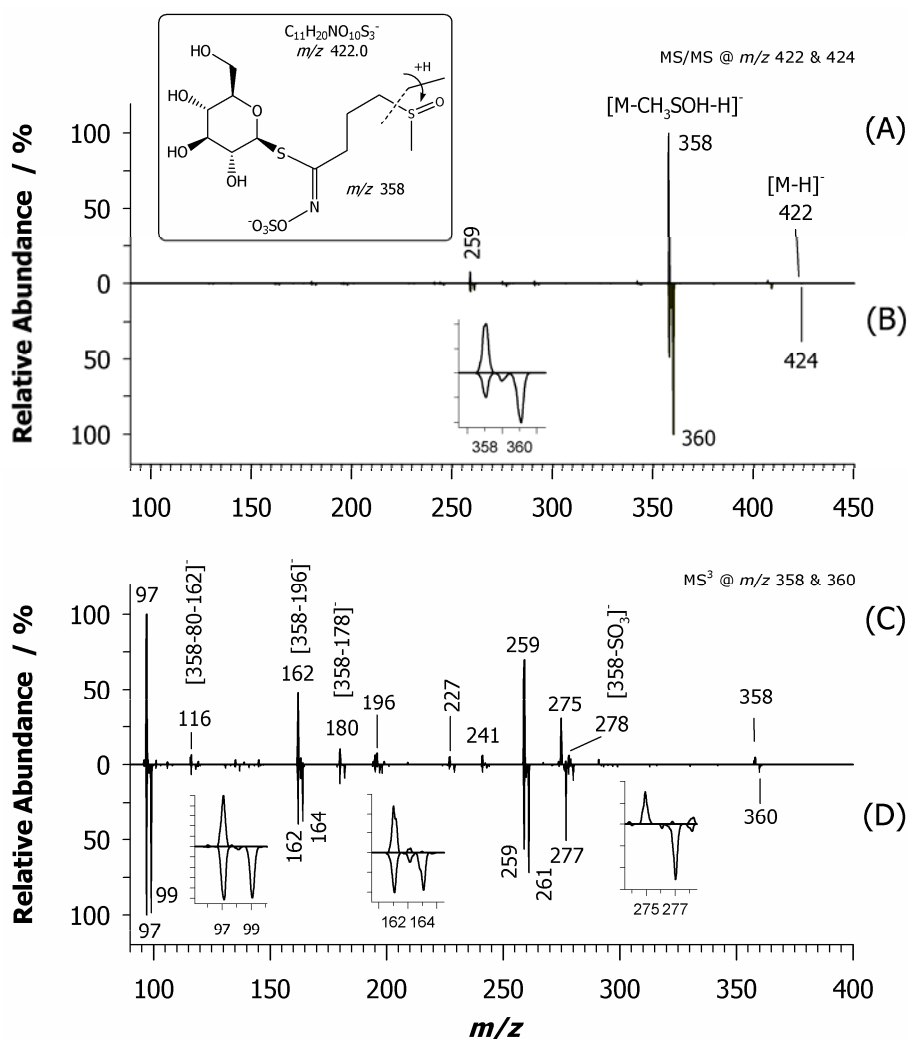

**Figure S5.** Product ion spectra obtained by LC-ESI-LTQ MS/MS in negative ion mode of (A) glucoiberin (3-methylsulfinylpropyl glucosinolate)  $[M-H]^-$  at  $m/z$  422 (20% collision energy). The main product ion is due to the characteristic loss of methanesulfenic acid ( $CH_3SOH$ , 64 Da) from the side chain of glucoiberin. (B) The A+2 isotopomer peak at  $m/z$  424 was fragmented at the same collision energy. Fragment ions (25% collision energy) at  $m/z$  414 and  $m/z$  416 were selected as precursor ions for a further stage of fragmentation (MS<sup>3</sup>) and the resulting mass spectra are illustrated in plots (C) and (D), respectively. See data reported in Table S5.

**Table S5.** Experimental and calculated ratios ( $I_A/I_{A+2}$ ) for the isotope abundances of the fragment ions as observed by CID of the +2 Da isotopomer of deprotonated glucoiberin  $[M-H]^-$  at  $m/z$  424 ( $C_{11}H_{20}NO_{10}S_3^- + 2$ ) and subsequent fragmentation of the prominent A+2 ion at  $m/z$  360.

| Ions A and A+2<br>( $m/z$ )                                  | Molecular<br>formula (A) | Expected<br>ratio | Expected ratio counting only<br>the contribution of $^{34}S$ | Measured ratio<br>( $n=5$ ) |
|--------------------------------------------------------------|--------------------------|-------------------|--------------------------------------------------------------|-----------------------------|
| 358-360                                                      | $C_{10}H_{16}NO_9S_2^-$  | 0.41              | 1 S : 2 S                                                    | 0.43±0.05                   |
| MS <sup>3</sup> at $m/z$ 360 ( $C_{10}H_{16}NO_9S_2^- + 2$ ) |                          |                   |                                                              |                             |
| 97-99                                                        | $HSO_4^-$                | 1.04              | 1 S : 1 S                                                    | 1.01±0.03                   |
| 162-164                                                      | $C_4H_4NO_4S^-$          | 1.06              | 1 S : 1 S                                                    | 1.03±0.05                   |
| 259-261                                                      | $C_6H_{11}O_9S^-$        | 0.70              | 1 S : 1 S                                                    | 0.73±0.05                   |
| 275-277                                                      | $C_6H_{11}O_8S_2^-$      | 0.03              | 0 S : 1 S                                                    | 0.02±0.02                   |

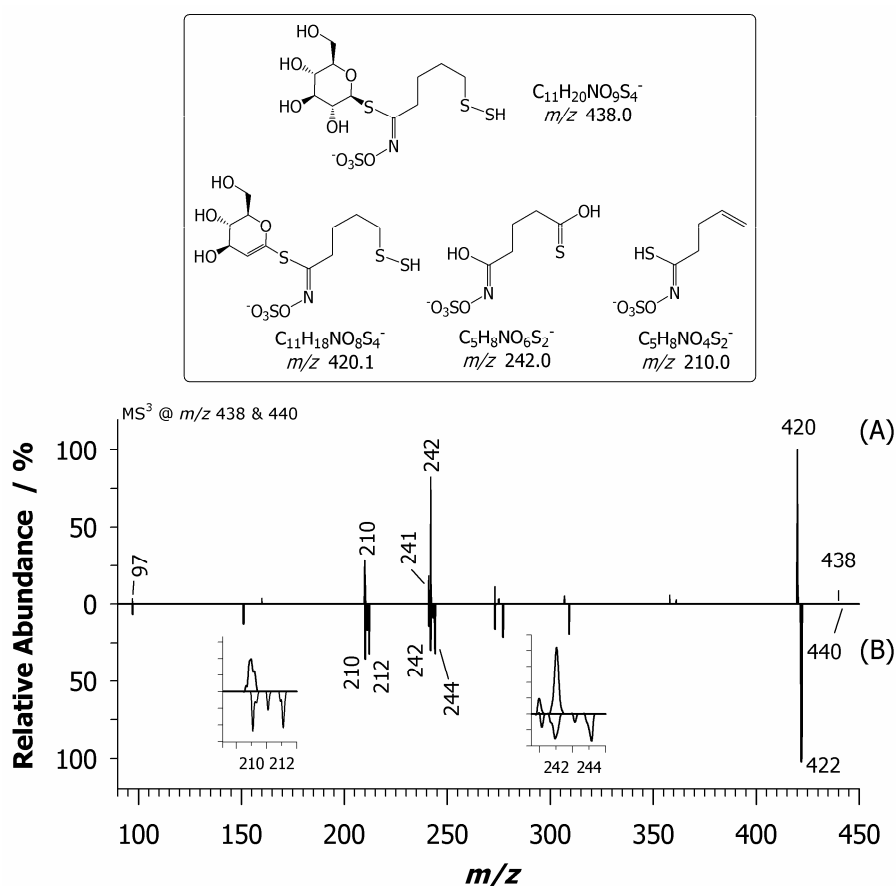

**Figure S6.** Product ion spectra ( $MS^3$ ) of deprotonated 4-( $\beta$ -D-glucopyranosyl-disulfanyl)butyl-GLS at 30% collision energy. Fragment ions at  $m/z$  438 and  $m/z$  440 were selected as precursor ions, plots (A) and (B), respectively. See data reported in Table S6.

**Table S6.** Experimental and calculated ratios ( $I_A/I_{A+2}$ ) for the isotope abundances of the fragment ions as observed by CID of the +2 Da isotopomer of the fragment ion at  $m/z$  440 ( $C_{11}H_{20}NO_9S_4^- + 2$ ) which is a product ion ( $MS^3$ ) of deprotonated 4-( $\beta$ -D-glucopyranosyl-disulfanyl)butyl-GLS  $[M-H]^-$  (see Figure 6).

| Ions A and A+2<br>( $m/z$ ) | Molecular<br>formula (A) | Expected<br>ratio | Expected ratio counting only<br>the contribution of $^{34}S$ | Measured ratio<br>( $n=5$ ) |
|-----------------------------|--------------------------|-------------------|--------------------------------------------------------------|-----------------------------|
| 97-99                       | $HSO_4^-$                | 2.93              | 3 S : 1 S                                                    | LSs                         |
| 210-212                     | $C_5H_8NO_4S_2^-$        | 1.03              | 1 S : 1 S                                                    | 1.04 $\pm$ 0.04             |
| 242-244                     | $C_5H_8NO_6S_2^-$        | 0.95              | 1 S : 1 S                                                    | 0.96 $\pm$ 0.05             |
| 420-422                     | $C_{11}H_{18}NO_8S_4^-$  | 0.01              | 0 S : 1 S                                                    | 0.01 $\pm$ 0.02             |

LSs= low signals.
